# Supplementary material for: High Caloric Diet Induces Memory Impairment and Disrupts Synaptic Plasticity in Aged Rats
Source: MDPI journal article supplement (doi:10.3390/cimb43030162), 2021-12-18
Supplement: s1 [file s1]

## Membrane 1

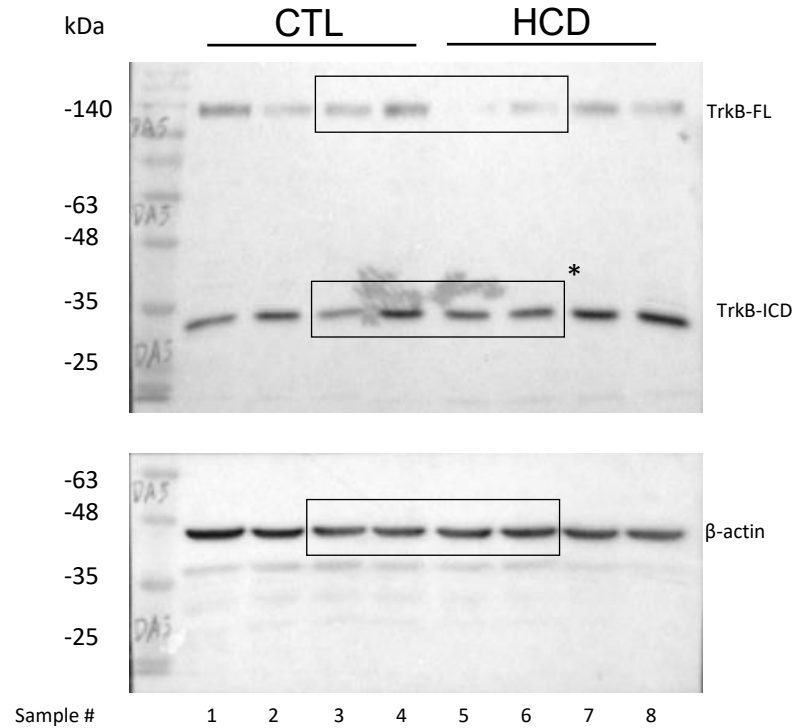

## Membrane 2

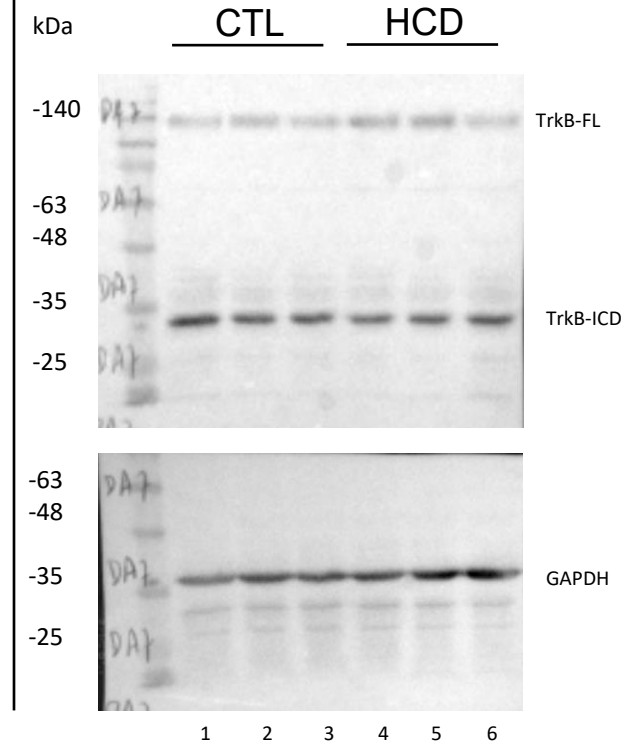

\* This background was only obtained for colorimetric picture; chemiluminescence image, the one used to quantify protein levels, did not present this background

Representative samples

## Densitometry readings

| Membrane | Group | Sample # | TrkB-FL | TrkB-ICD | GAPDH  | $\beta$ -actin |
|----------|-------|----------|---------|----------|--------|----------------|
| 1        | CTL   | 1        | 382201  | 152455   | N/A    | 215768         |
|          |       | 2        | 190342  | 157916   |        | 177580         |
|          |       | 3        | 247296  | 103043   |        | 144611         |
|          |       | 4        | 362960  | 176731   |        | 139843         |
|          | HCD   | 5        | 37764   | 153038   |        | 156539         |
|          |       | 6        | 156683  | 160553   |        | 170865         |
|          |       | 7        | 233075  | 205306   |        | 173655         |
|          |       | 8        | 202691  | 226244   |        | 161553         |
| 2        | CTL   | 1        | 169372  | 338471   | 145685 | N/A            |
|          |       | 2        | 173969  | 229623   | 194133 |                |
|          |       | 3        | 159964  | 222629   | 170312 |                |
|          | HCD   | 4        | 195274  | 205292   | 214540 |                |
|          |       | 5        | 190122  | 217167   | 270429 |                |
|          |       | 6        | 136109  | 249669   | 256713 |                |
